# Supplementary material for: Oncotype DX results increase concordance in adjuvant chemotherapy recommendations for early-stage breast cancer
Source: PubMed Central journal article supplement (PMC10250312; doi:10.1038/s41523-023-00559-6), 2023-06-08
Supplement: 41523_2023_559_MOESM1_ESM.pdf [file 41523_2023_559_MOESM1_ESM.pdf]

### Supplementary Figure 1. Change of therapy indication after RS

a) Therapeutic recommendations pre- and post- RS per patient. b) Rate and type of therapeutic indication change post-RS results by oncologist country and experience.

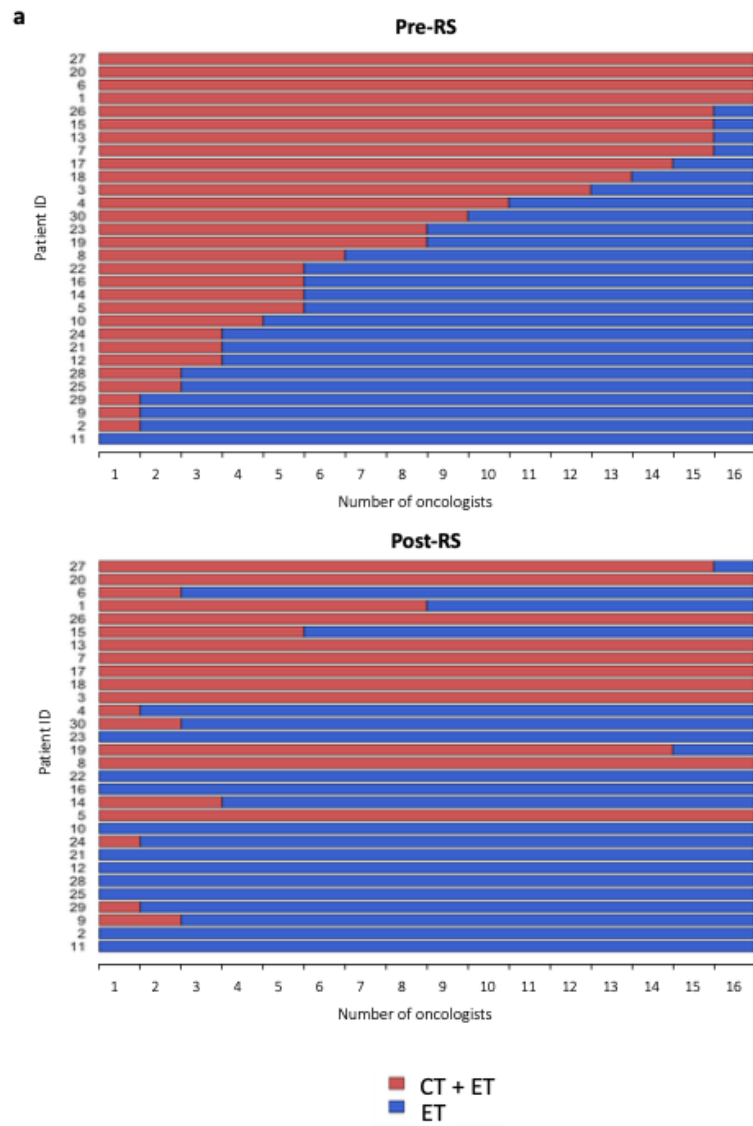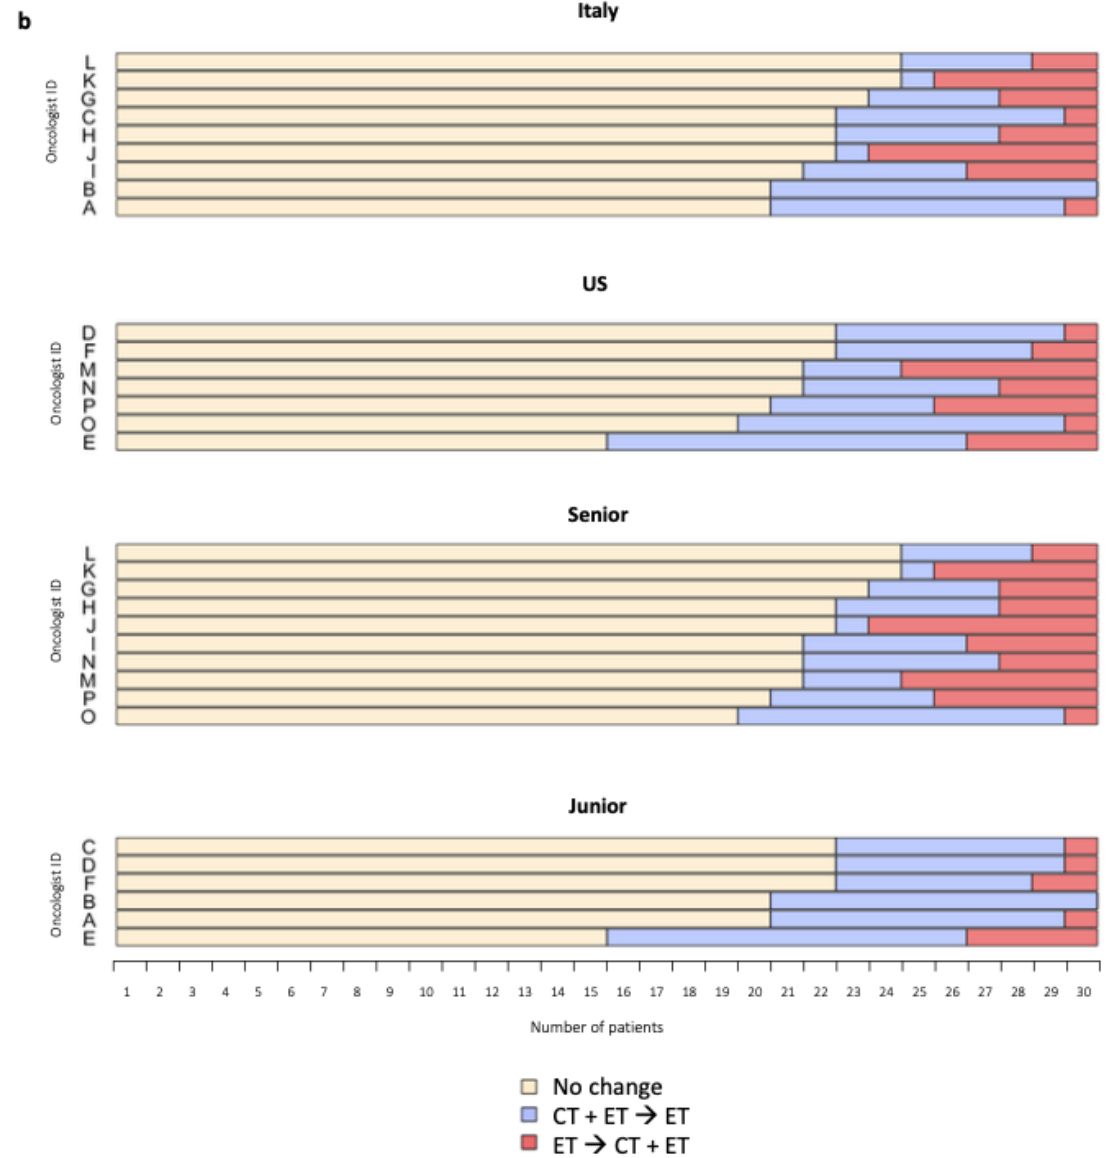

**Supplementary Figure 2. Change in the degree of confidence in treatment recommendation pre- and post- RS results by oncologist country and experience**

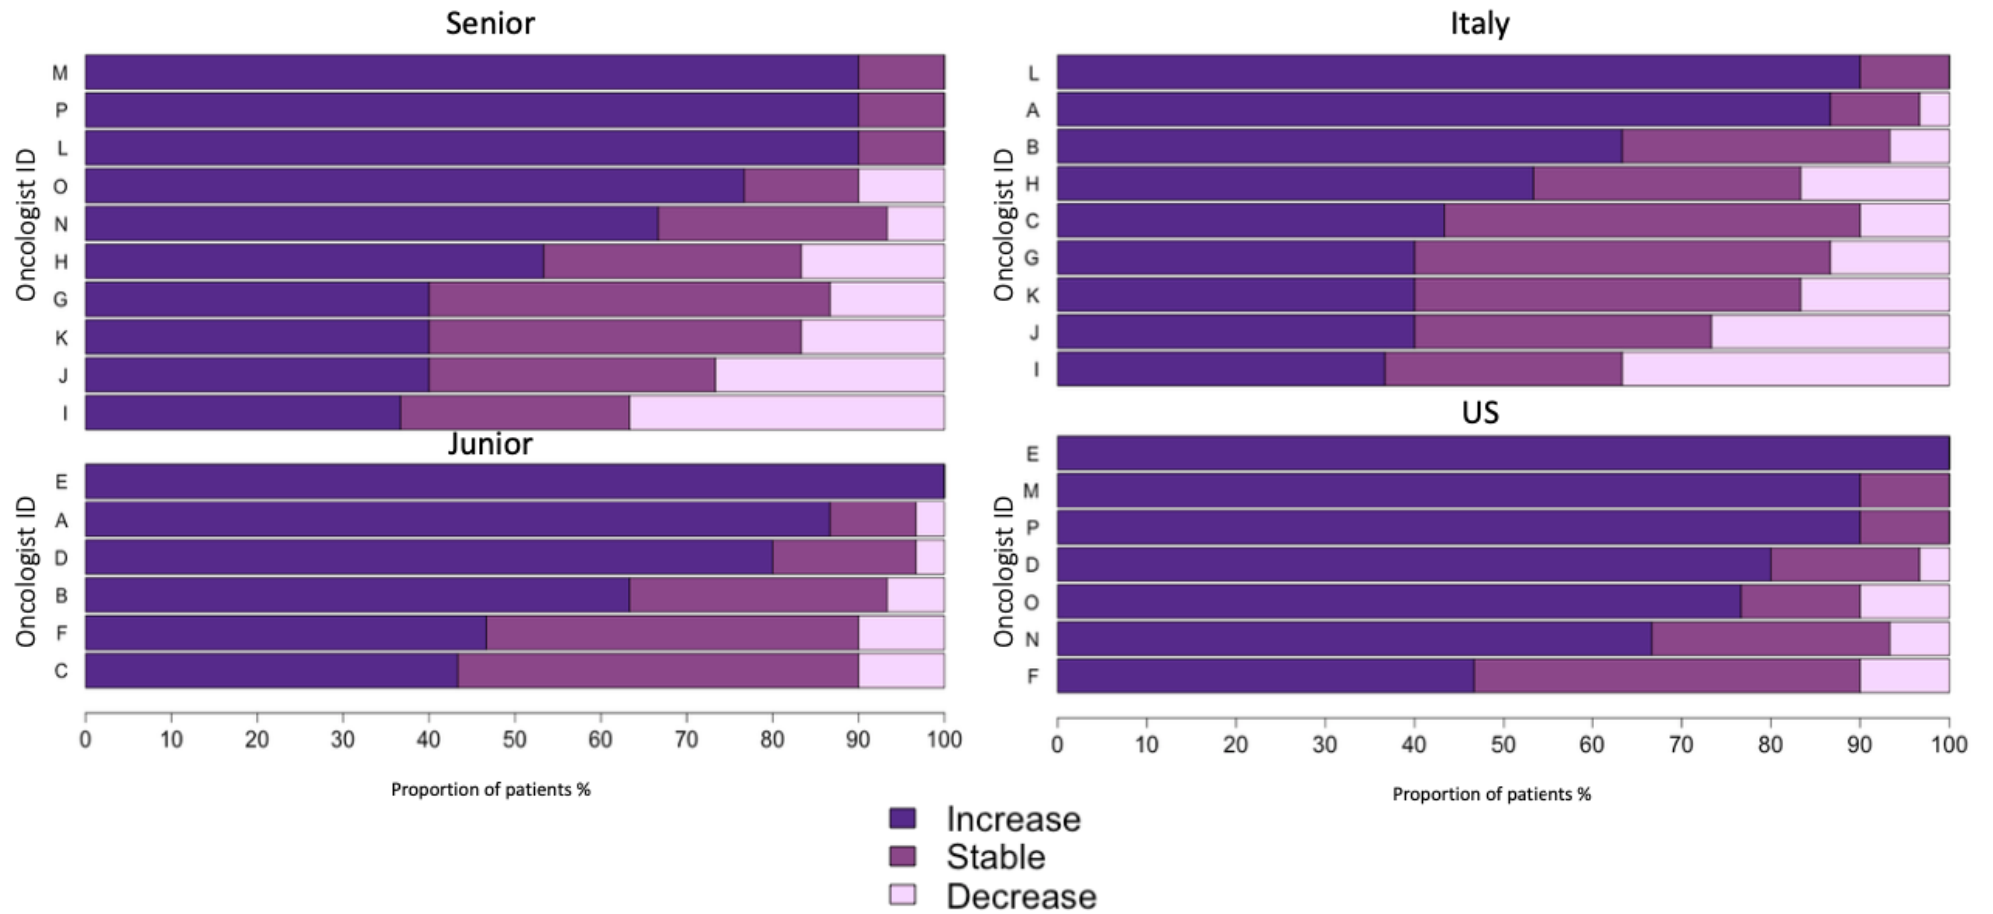

**Supplementary Table 1. Clinicopathologic variables and RS results of the 30 patients**

| ID | Age (range) | Menopausal status   | Histotype | Stage | pT  | Grade | Ki67 | ER | PgR | RS* |
|----|-------------|---------------------|-----------|-------|-----|-------|------|----|-----|-----|
| 1  | 41-45       | Pre/peri-menopausal | Ductal    | pT2   | 2,2 | 3     | 34   | 90 | 90  | 15  |
| 2  | 66-70       | Post-menopausal     | Ductal    | pT1c  | 1,7 | 2     | 26   | 90 | 80  | 15  |
| 3  | 56-60       | Post-menopausal     | Lobular   | pT2   | 2,5 | 3     | 37   | 90 | 20  | 41  |
| 4  | 61-65       | Post-menopausal     | Ductal    | pT1c  | 1,1 | 2     | 29   | 90 | 0   | 21  |
| 5  | 51-55       | Post-menopausal     | Ductal    | pT1c  | 2,0 | 2     | 19   | 90 | 10  | 32  |
| 6  | 36-40       | Pre/peri-menopausal | Ductal    | pT1c  | 1,6 | 2     | 50   | 95 | 95  | 2   |
| 7  | 56-60       | Post-menopausal     | Ductal    | pT1c  | 1,2 | 3     | 31   | 90 | 1   | 39  |
| 8  | 41-45       | Pre/peri-menopausal | Ductal    | pT1c  | 1,9 | 2     | 28   | 90 | 50  | 52  |
| 9  | 66-70       | Post-menopausal     | Ductal    | pT1c  | 1,5 | 2     | 27   | 90 | 90  | 23  |
| 10 | 46-50       | Post-menopausal     | Lobular   | pT1c  | 1,5 | 3     | 28   | 90 | 90  | 9   |
| 11 | 71-75       | Post-menopausal     | Mucinous  | pT2   | 2,8 | 2     | 16   | 80 | 5   | 24  |
| 12 | 66-70       | Post-menopausal     | Lobular   | pT2   | 2,3 | 2     | 24   | 90 | 5   | 23  |
| 13 | 46-50       | Pre/peri-menopausal | Ductal    | pT1c  | 1,7 | 2     | 29   | 90 | 10  | 29  |
| 14 | 66-70       | Post-menopausal     | Ductal    | pT2   | 2,8 | 2     | 28   | 90 | 90  | 25  |
| 15 | 46-50       | Post-menopausal     | Ductal    | pT1c  | 1,4 | 3     | 49   | 90 | 70  | 15  |
| 16 | 61-65       | Post-menopausal     | Lobular   | pT2   | 3,2 | 2     | 26   | 90 | 70  | 13  |
| 17 | 51-55       | Post-menopausal     | Ductal    | pT2   | 2,5 | 2     | 32   | 90 | 20  | 29  |
| 18 | 36-40       | Pre/peri-menopausal | Ductal    | pT1c  | 1,8 | 3     | 28   | 95 | 90  | 37  |
| 19 | 41-45       | Pre/peri-menopausal | Ductal    | pT2   | 2,1 | 2     | 26   | 90 | 80  | 24  |
| 20 | 26-30       | Pre/peri-menopausal | Ductal    | pT2   | 3,0 | 2     | 29   | 90 | 1   | 41  |
| 21 | 46-50       | Pre/peri-menopausal | Ductal    | pT2   | 2,1 | 2     | 22   | 90 | 90  | 10  |
| 22 | 36-40       | Pre/peri-menopausal | Ductal    | pT1c  | 1,1 | 2     | 25   | 90 | 80  | 9   |
| 23 | 41-45       | Pre/peri-menopausal | Ductal    | pT1c  | 1,6 | 2     | 30   | 90 | 90  | 11  |
| 24 | 71-75       | Post-menopausal     | Ductal    | pT2   | 2,5 | 2     | 27   | 90 | 20  | 19  |
| 25 | 46-50       | Pre/peri-menopausal | Ductal    | pT2   | 2,2 | 2     | 21   | 90 | 90  | 9   |
| 26 | 46-50       | Post-menopausal     | Ductal    | pT2   | 2,4 | 3     | 35   | 90 | 40  | 29  |

|    |       |                     |        |      |     |   |    |    |    |    |
|----|-------|---------------------|--------|------|-----|---|----|----|----|----|
| 27 | 41-45 | Pre/peri-menopausal | Ductal | pT1c | 1,3 | 3 | 48 | 90 | 90 | 27 |
| 28 | 66-70 | Post-menopausal     | Ductal | pT2  | 2,6 | 2 | 19 | 90 | 10 | 22 |
| 29 | 51-55 | Post-menopausal     | Ductal | pT1c | 1,1 | 2 | 24 | 90 | 30 | 17 |
| 30 | 56-60 | Post-menopausal     | Ductal | pT2  | 3,0 | 2 | 23 | 90 | 5  | 21 |

\*This column was added only for the second contact
